# Supplementary material for: Gallic acid loaded onto polyethylenimine-coated human serum albumin nanoparticles (PEI-HSA-GA NPs) stabilizes α-synuclein in the unfolded conformation and inhibits aggregation
Source: Royal Society of Chemistry journal article supplement (doi:10.1039/c6ra08502d), 2016-01-01
Supplement: c6ra08502d1.pdf [file c6ra08502d1.pdf]

# **Gallic Acid Loaded onto Polyethylenimine-Coated Human Serum Albumin Nanoparticles (PEI-HSA-GA NPs) Stabilizes $\alpha$ -Synuclein in the Unfolded Conformation and Inhibits Aggregation**

Hossein Mohammad-Beigi <sup>1,2</sup>, Dina Morshedi <sup>3</sup>, Seyed Abbas Shojaosadati <sup>2</sup>, Jannik Nedergaard Pedersen <sup>1</sup>, Amir Tayaranian Marvian <sup>4</sup>, Farhang Aliakbari <sup>3,5</sup>, Gunna Christiansen <sup>4</sup>, Jan Skov Pedersen <sup>1,6</sup>, Daniel E. Otzen <sup>1,7</sup>

<sup>1</sup> Interdisciplinary Nanoscience Centre (iNANO), Aarhus University, Gustav Wieds Vej 14, DK – 8000 Aarhus C

<sup>2</sup> Biotechnology Group, Faculty of Chemical Engineering, Tarbiat Modares University, P.O. Box 14115-143, Tehran, Iran

<sup>3</sup> Department of Industrial and Environmental Biotechnology, National Institute of Genetic Engineering and Biotechnology, P.O. Box: 1417863171, Tehran, Iran

<sup>4</sup> Department of Biomedicine-Medical Microbiology and Immunology, Aarhus University, 8000 Aarhus C, Denmark

<sup>5</sup> Student Research Committee and Department of Medical Biotechnology, School of Medicine, Semnan University of Medical Sciences, Semnan, Iran.

<sup>6</sup> Department of Chemistry, Aarhus University, Langelandsgade 120, DK – 8000 Aarhus C

<sup>7</sup> Department of Molecular Biology and Genetics, Aarhus University, Gustav Wieds Vej 10C, DK – 8000 Aarhus C

Corresponding Authors: (D.E.Otzen) email: [dao@inano.au.dk](mailto:dao@inano.au.dk) and (S.A.Shojaosadati) email: [Shoja\\_sa@modares.ac.ir](mailto:Shoja_sa@modares.ac.ir)

## Supplementary Results

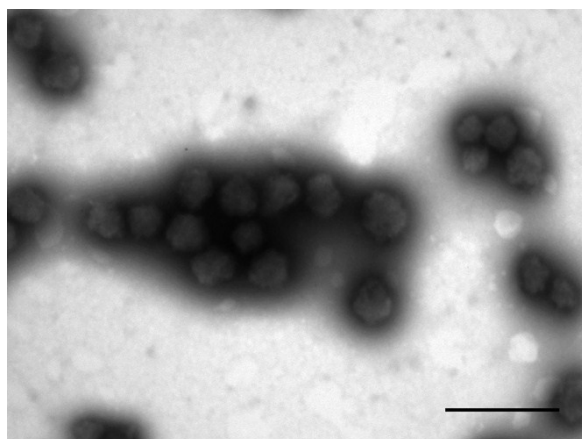

Fig. S1. TEM images of PEI-HSA-GA NPs. Scale bar, 200 nm.

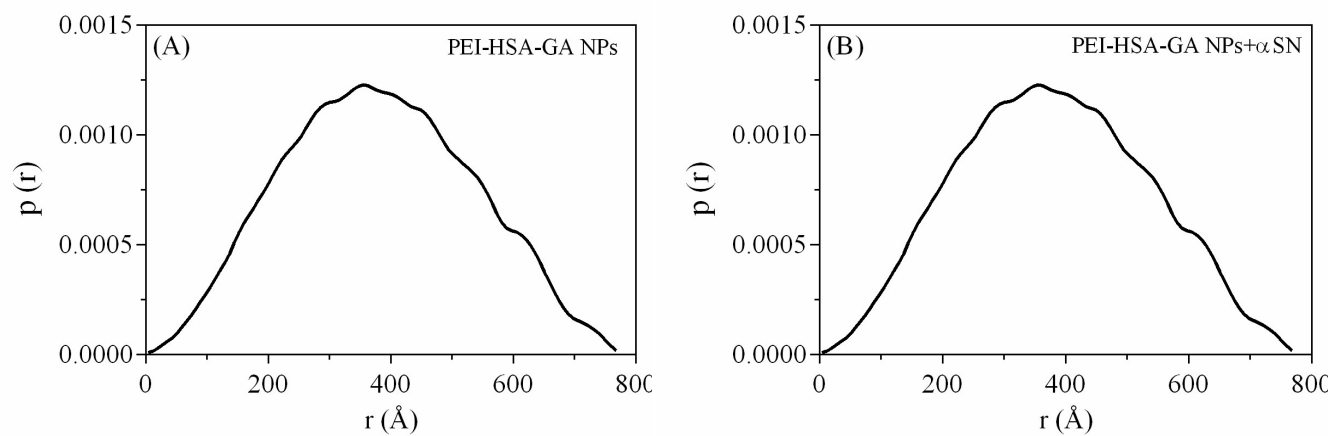

Fig. S2. Pair-distance distribution function for (A) PEI-HSA-GA NPs and (B) PEI-HSA-GA NPs+ $\alpha$ SN.
